# Supplementary material
Source: publisher site journal article supplement (https://www.spandidos-publications.com/6801/downloadSupplementary)
Supplement: Supplementary file 1 [file downloadSupplementary]

## Sheet: Sheet1
Table SVIII. GO annotation analysis of molecular function for targets of downregulated piwi-interacting RNAs.
Term	Overlap	P-value	Adjusted P-value	Odds Ratio	Combined Score	Genes
C3HC4-type RING Finger Domain Binding (GO:0055131)	45414	0.0040047	0.611188	32.0852	177.119	HSPA1B;HSPA1A
Ubiquitin Protein Ligase Binding (GO:0031625)	13/271	0.0040137	0.611188	2.45996	13.5742	DAXX;SMAD3;HSPA7;AMBRA1;FHIT;SCAMP3;MC1R;CBS;ZNF746;TRIM37;HSPA1B;HSPA1A;WRAP53
Ubiquitin-Like Protein Ligase Binding (GO:0044389)	13/289	0.00680747	0.611188	2.29739	11.4633	DAXX;SMAD3;HSPA7;AMBRA1;FHIT;SCAMP3;MC1R;CBS;ZNF746;TRIM37;HSPA1B;HSPA1A;WRAP53
Protein Phosphatase Binding (GO:0019903)	7/115	0.00942636	0.611188	3.14126	14.6516	ANKLE2;PPP1R3B;LCK;SPHK1;DAB2IP;PIK3R2;AMBRA1
Protein Phosphatase 2A Binding (GO:0051721)	44986	0.0110963	0.611188	7.23067	32.5462	ANKLE2;SPHK1;DAB2IP
Disordered Domain Specific Binding (GO:0097718)	44986	0.0110963	0.611188	7.23067	32.5462	HSP90AA2P;HSP90AB2P;HSPA1A
Microtubule Minus-End Binding (GO:0051011)	45628	0.0240443	0.611188	9.62211	35.8698	MACF1;TUBGCP3
Cytochrome-C Oxidase Activity (GO:0004129)	45628	0.0240443	0.611188	9.62211	35.8698	COX4I1;MTCO2P12
Insulin-Like Growth Factor Receptor Binding (GO:0005159)	41306	0.0280371	0.611188	8.74693	31.2635	SHC1;IGF2
Phosphotyrosine Residue Binding (GO:0001784)	14305	0.0451144	0.611188	4.01375	12.4368	SHC1;LCK;PIK3R2
Transforming Growth Factor Beta Receptor Binding (GO:0005160)	43132	0.0514435	0.611188	6.01198	17.8392	SMAD3;TGFBR2
R-SMAD Binding (GO:0070412)	43497	0.056737	0.611188	5.65804	16.2348	SMAD3;LDLRAD4
Ubiquitin-Specific Protease Binding (GO:1990381)	43862	0.0622108	0.611188	5.34343	14.8399	RHBDD2;DERL3
Pyridoxal Phosphate Binding (GO:0030170)	43862	0.0622108	0.611188	5.34343	14.8399	PDXK;CBS
Protein Phosphorylated Amino Acid Binding (GO:0045309)	16497	0.06413	0.611188	3.4393	9.44723	SHC1;LCK;PIK3R2
GTPase Activator Activity (GO:0005096)	8/211	0.0690373	0.611188	1.90538	5.0933	RAP1GAP2;TBC1D9B;TBC1D4;NPRL2;SGSM2;ARHGAP19;SIPA1L2;SRGAP1
bHLH Transcription Factor Binding (GO:0043425)	44593	0.0736614	0.611188	4.8086	12.5422	SMAD3;BHLHE40
Protein Tyrosine/Serine/Threonine Phosphatase Activity (GO:0008138)	44958	0.07962	0.611188	4.57938	11.5881	DUSP4;DUSP19
Active Monoatomic Ion Transmembrane Transporter Activity (GO:0022853)	45323	0.0857225	0.611188	4.37101	10.738	COX4I1;MTCO2P12
FAD Binding (GO:0071949)	45689	0.0919606	0.611188	4.18075	9.97692	CYB5R2;MICAL3
Phosphatidylinositol-4-Phosphate Binding (GO:0070273)	45689	0.0919606	0.611188	4.18075	9.97692	GSDMD;DAB2IP
GTPase Regulator Activity (GO:0030695)	13/424	0.0970685	0.611188	1.53199	3.57311	RAP1GAP2;TRIO;TBC1D9B;IQSEC2;NPRL2;ARHGAP19;SIPA1L2;TBC1D4;SGSM2;RANGRF;RGL4;ARHGEF7;SRGAP1
Sterol Esterase Activity (GO:0004771)	45413	0.0981617	0.611188	12.0018	27.8579	LCAT
Myosin Light Chain Binding (GO:0032027)	45413	0.0981617	0.611188	12.0018	27.8579	SPATA6
Neurotrophin TRK Receptor Binding (GO:0005167)	45413	0.0981617	0.611188	12.0018	27.8579	SHC1
Neurotrophin TRKA Receptor Binding (GO:0005168)	45413	0.0981617	0.611188	12.0018	27.8579	SHC1
Carnitine O-acyltransferase Activity (GO:0016406)	45413	0.0981617	0.611188	12.0018	27.8579	CPT1C
Protein Carboxyl O-methyltransferase Activity (GO:0051998)	45413	0.0981617	0.611188	12.0018	27.8579	PCMTD2
Cytochrome-B5 Reductase Activity, Acting On NAD(P)H (GO:0004128)	45413	0.0981617	0.611188	12.0018	27.8579	CYB5R2
Adenyl Ribonucleotide Binding (GO:0032559)	10/309	0.103751	0.611188	1.61709	3.66393	MAP4K1;HSP90AA2P;HSP90AB2P;PDXK;SPHK1;VPS4A;PDE4B;SMC4;HSPA1B;HSPA1A
Tumor Necrosis Factor Receptor Superfamily Binding (GO:0032813)	46419	0.104812	0.611188	3.8459	8.67477	DAB2IP;TRIM37
Acetyltransferase Activity (GO:0016407)	46419	0.104812	0.611188	3.8459	8.67477	SPHK1;LCAT
Oxidoreductase Activity, Acting On Paired Donors, With Incorporation Or Reduction Of Molecular Oxygen, NAD(P)H As One Donor, And Incorporation Of One Atom Of Oxygen (GO:0016709)	46419	0.104812	0.611188	3.8459	8.67477	MICAL3;CYP2E1
Protein Kinase Activator Activity (GO:0030295)	32234	0.106207	0.611188	2.29359	5.14307	DAXX;DUSP19;DAB2IP;IGF2
Galactosidase Activity (GO:0015925)	45444	0.116609	0.611188	9.60098	20.6318	GLB1L3
DEAD/H-box RNA Helicase Binding (GO:0017151)	45444	0.116609	0.611188	9.60098	20.6318	SMAD3
G-quadruplex RNA Binding (GO:0002151)	45444	0.116609	0.611188	9.60098	20.6318	DHX30
Mitogen-Activated Protein Kinase Kinase Binding (GO:0031434)	45444	0.116609	0.611188	9.60098	20.6318	DAB2IP
Aryl Sulfotransferase Activity (GO:0004062)	45444	0.116609	0.611188	9.60098	20.6318	SULT1A2
Signal Recognition Particle Binding (GO:0005047)	45444	0.116609	0.611188	9.60098	20.6318	DERL3
Sodium Ion Binding (GO:0031402)	45444	0.116609	0.611188	9.60098	20.6318	PDXK
ATP Binding (GO:0005524)	9/279	0.120186	0.611188	1.61008	3.4113	MAP4K1;HSP90AA2P;HSP90AB2P;PDXK;SPHK1;VPS4A;SMC4;HSPA1B;HSPA1A
Oxidoreductase Activity, Acting On The CH-OH Group Of Donors, NAD Or NADP As Acceptor (GO:0016616)	34790	0.130318	0.611188	2.1164	4.31276	AKR7A2;G6PD;H6PD;HIBADH
Glycogen Binding (GO:2001069)	45474	0.13468	0.611188	8.00041	16.0397	PPP1R3B
C-C Chemokine Binding (GO:0019957)	45474	0.13468	0.611188	8.00041	16.0397	CCR3
CD4 Receptor Binding (GO:0042609)	45474	0.13468	0.611188	8.00041	16.0397	LCK
Histone Ubiquitin Ligase Activity (GO:0140852)	45474	0.13468	0.611188	8.00041	16.0397	TRIM37
Urate Transmembrane Transporter Activity (GO:0015143)	45474	0.13468	0.611188	8.00041	16.0397	SLC34A1
Xylosyltransferase Activity (GO:0042285)	45474	0.13468	0.611188	8.00041	16.0397	LARGE2
NMDA Glutamate Receptor Activity (GO:0004972)	45474	0.13468	0.611188	8.00041	16.0397	PTK2B
Natural Killer Cell Lectin-Like Receptor Binding (GO:0046703)	45474	0.13468	0.611188	8.00041	16.0397	MICB
Neutral L-amino Acid:Sodium Symporter Activity (GO:0005295)	45474	0.13468	0.611188	8.00041	16.0397	SLC6A9
U1 snRNA Binding (GO:0030619)	45474	0.13468	0.611188	8.00041	16.0397	PRPF8
Acetylcholine Receptor Binding (GO:0033130)	45474	0.13468	0.611188	8.00041	16.0397	RAPSN
Oxidoreductase Activity, Acting On Paired Donors, With Oxidation Of A Pair Of Donors Resulting In The Reduction Of Molecular Oxygen To Two Molecules Of Water (GO:0016717)	45474	0.13468	0.611188	8.00041	16.0397	RAPSN
Calcium:Monoatomic Cation Antiporter Activity (GO:0015368)	45474	0.13468	0.611188	8.00041	16.0397	SLC8B1
Protein-Glutamine Gamma-Glutamyltransferase Activity (GO:0003810)	45474	0.13468	0.611188	8.00041	16.0397	TGM2
Protein Tyrosine Kinase Activity (GO:0004713)	36251	0.145024	0.611188	2.02687	3.91361	LCK;TYRO3;PTK2B;BAZ1B
Double-Stranded RNA Binding (GO:0003725)	23802	0.147771	0.611188	2.32747	4.45032	DHX30;STRBP;AGO2
Vascular Endothelial Growth Factor Receptor 2 Binding (GO:0043184)	45505	0.152382	0.611188	6.85714	12.9008	DAB2IP
Volume-Sensitive Anion Channel Activity (GO:0005225)	45505	0.152382	0.611188	6.85714	12.9008	LRRC8E
L-lysine Transmembrane Transporter Activity (GO:0015189)	45505	0.152382	0.611188	6.85714	12.9008	SLC7A3
Metal-Dependent Deubiquitinase Activity (GO:0140492)	45505	0.152382	0.611188	6.85714	12.9008	PRPF8
Nuclear Glucocorticoid Receptor Binding (GO:0035259)	45505	0.152382	0.611188	6.85714	12.9008	SMAD3
UDP-xylosyltransferase Activity (GO:0035252)	45505	0.152382	0.611188	6.85714	12.9008	LARGE2
Activin Receptor Activity (GO:0017002)	45505	0.152382	0.611188	6.85714	12.9008	TGFBR2
pre-mRNA Intronic Binding (GO:0097157)	45505	0.152382	0.611188	6.85714	12.9008	PRPF8
Kinase Inhibitor Activity (GO:0019210)	12451	0.15296	0.611188	3.00353	5.63936	DUSP19;MBIP
Sodium Channel Regulator Activity (GO:0017080)	12451	0.15296	0.611188	3.00353	5.63936	CAV3;RANGRF
Non-Membrane Spanning Protein Tyrosine Kinase Activity (GO:0004715)	13181	0.167406	0.611188	2.82656	5.05201	LCK;PTK2B
Glycine Transmembrane Transporter Activity (GO:0015187)	45536	0.169722	0.611188	5.99969	10.641	SLC6A9
Tumor Necrosis Factor Receptor Binding (GO:0005164)	45536	0.169722	0.611188	5.99969	10.641	TRIM37
Type I Transforming Growth Factor Beta Receptor Binding (GO:0034713)	45536	0.169722	0.611188	5.99969	10.641	TGFBR2
MAP Kinase Tyrosine Phosphatase Activity (GO:0033550)	45536	0.169722	0.611188	5.99969	10.641	DUSP4
MAP Kinase Tyrosine/Serine/Threonine Phosphatase Activity (GO:0017017)	45536	0.169722	0.611188	5.99969	10.641	DUSP4
O-methyltransferase Activity (GO:0008171)	45536	0.169722	0.611188	5.99969	10.641	CMTR2
Mitogen-Activated Protein Kinase Kinase Kinase Binding (GO:0031435)	45536	0.169722	0.611188	5.99969	10.641	DUSP19
Oxidoreductase Activity, Acting On NAD(P)H, Heme Protein As Acceptor (GO:0016653)	45536	0.169722	0.611188	5.99969	10.641	CYB5R2
Phosphate Ion Binding (GO:0042301)	45536	0.169722	0.611188	5.99969	10.641	RPH3A
Bioactive Lipid Receptor Activity (GO:0045125)	45536	0.169722	0.611188	5.99969	10.641	SPHK1
Calcium:Sodium Antiporter Activity (GO:0005432)	45536	0.169722	0.611188	5.99969	10.641	SLC8B1
Potassium Ion Binding (GO:0030955)	45536	0.169722	0.611188	5.99969	10.641	PDXK
co-SMAD Binding (GO:0070410)	45536	0.169722	0.611188	5.99969	10.641	SMAD3
Protein Tyrosine/Threonine Phosphatase Activity (GO:0008330)	45536	0.169722	0.611188	5.99969	10.641	DUSP4
Transmembrane Receptor Protein Kinase Activity (GO:0019199)	13547	0.174715	0.611188	2.74567	4.79009	TYRO3;TGFBR2
Phosphatidylinositol Phosphate Binding (GO:1901981)	4/109	0.184358	0.611188	1.8329	3.09921	RPH3A;GSDMD;DAB2IP;TECPR1
ABC-type Xenobiotic Transporter Activity (GO:0008559)	45566	0.186709	0.611188	5.33279	8.9495	ABCA8
BMP Receptor Binding (GO:0070700)	45566	0.186709	0.611188	5.33279	8.9495	ELAPOR2
Transforming Growth Factor Beta Receptor Activity (GO:0005024)	45566	0.186709	0.611188	5.33279	8.9495	TGFBR2
Transmembrane Receptor Protein Serine/Threonine Kinase Binding (GO:0070696)	45566	0.186709	0.611188	5.33279	8.9495	ELAPOR2
Inositol 1,4,5 Trisphosphate Binding (GO:0070679)	45566	0.186709	0.611188	5.33279	8.9495	RPH3A
L-arginine Transmembrane Transporter Activity (GO:0061459)	45566	0.186709	0.611188	5.33279	8.9495	SLC7A3
MAP-kinase Scaffold Activity (GO:0005078)	45566	0.186709	0.611188	5.33279	8.9495	DUSP19
RNA Polymerase II Activity (GO:0001055)	45566	0.186709	0.611188	5.33279	8.9495	POLR2F
Myosin II Binding (GO:0045159)	45566	0.186709	0.611188	5.33279	8.9495	SHROOM4
alditol:NADP+ 1-Oxidoreductase Activity (GO:0004032)	45566	0.186709	0.611188	5.33279	8.9495	AKR7A2
Phospholipase Activator Activity (GO:0016004)	45566	0.186709	0.611188	5.33279	8.9495	LCK
Fatty Acid Synthase Activity (GO:0004312)	45566	0.186709	0.611188	5.33279	8.9495	FASN
Phosphatase Binding (GO:0019902)	4/112	0.196782	0.611188	1.78171	2.89645	SMAD3;LCK;PIK3R2;SFI1
Phosphatidylinositol-3-Phosphate Binding (GO:0032266)	14642	0.19692	0.611188	2.52851	4.10873	DAB2IP;TECPR1
Histone Methyltransferase Binding (GO:1990226)	45597	0.203349	0.611188	4.79926	7.64442	PHF1
mRNA Methyltransferase Activity (GO:0008174)	45597	0.203349	0.611188	4.79926	7.64442	CMTR2
RNA Polymerase I Activity (GO:0001054)	45597	0.203349	0.611188	4.79926	7.64442	POLR2F
Toll-like Receptor Binding (GO:0035325)	45597	0.203349	0.611188	4.79926	7.64442	DAB2IP
cAMP Binding (GO:0030552)	45597	0.203349	0.611188	4.79926	7.64442	PDE4B
Sodium:Phosphate Symporter Activity (GO:0005436)	45597	0.203349	0.611188	4.79926	7.64442	SLC34A1
Protein Tyrosine Phosphatase Activity (GO:0004725)	27820	0.203454	0.611188	1.97564	3.14584	DUSP4;PTPRA;PGPEP1
2-Oxoglutarate-Dependent Dioxygenase Activity (GO:0016706)	15008	0.204398	0.611188	2.46355	3.91135	ALKBH2;PHF1
Phosphotransferase Activity, Alcohol Group As Acceptor (GO:0016773)	28185	0.208743	0.611188	1.94884	3.05316	PDXK;TKFC;SPHK1
Magnesium Ion Binding (GO:0000287)	5/155	0.211899	0.611188	1.60404	2.4889	PDXK;SPHK1;XYLT2;PGPEP1;EXTL3
Single-Stranded RNA Binding (GO:0003727)	15738	0.219442	0.611188	2.34314	3.55377	STRBP;AGO2
Histone H3K36 Methyltransferase Activity (GO:0046975)	45627	0.21965	0.611188	4.36275	6.61271	NSD3
CoA-ligase Activity (GO:0016405)	45627	0.21965	0.611188	4.36275	6.61271	SLC27A5
Insulin-Like Growth Factor I Binding (GO:0031994)	45627	0.21965	0.611188	4.36275	6.61271	LRP2
Vascular Endothelial Growth Factor Receptor Binding (GO:0005172)	45627	0.21965	0.611188	4.36275	6.61271	DAB2IP
Lipase Activator Activity (GO:0060229)	45627	0.21965	0.611188	4.36275	6.61271	LCK
Acid-Thiol Ligase Activity (GO:0016878)	45627	0.21965	0.611188	4.36275	6.61271	SLC27A5
Ubiquitin Ligase-Substrate Adaptor Activity (GO:1990756)	16103	0.226999	0.611188	2.28724	3.39153	ZSWIM8;KEAP1
Kinase Activator Activity (GO:0019209)	16103	0.226999	0.611188	2.28724	3.39153	DAXX;DUSP19
Protein Kinase Inhibitor Activity (GO:0004860)	16469	0.234575	0.611188	2.23393	3.23916	DUSP19;MBIP
Proton Transmembrane Transporter Activity (GO:0015078)	16469	0.234575	0.611188	2.23393	3.23916	COX4I1;MTCO2P12
3',5'-cyclic-AMP Phosphodiesterase Activity (GO:0004115)	41275	0.235617	0.611188	3.99898	5.78071	PDE4B
Histone H3K4 Methyltransferase Activity (GO:0042800)	41275	0.235617	0.611188	3.99898	5.78071	NSD3
CARD Domain Binding (GO:0050700)	41275	0.235617	0.611188	3.99898	5.78071	CARD14
Histone H3K9 Demethylase Activity (GO:0032454)	41275	0.235617	0.611188	3.99898	5.78071	PHF1
Transmembrane Receptor Protein Tyrosine Kinase Adaptor Activity (GO:0005068)	41275	0.235617	0.611188	3.99898	5.78071	SHC1
G Protein-Coupled Chemoattractant Receptor Activity (GO:0001637)	41275	0.235617	0.611188	3.99898	5.78071	CCR3
Ubiquitination-Like Modification-Dependent Protein Binding (GO:0140035)	41275	0.235617	0.611188	3.99898	5.78071	DAXX
I-SMAD Binding (GO:0070411)	41275	0.235617	0.611188	3.99898	5.78071	SMAD3
U6 snRNA Binding (GO:0017070)	41275	0.235617	0.611188	3.99898	5.78071	PRPF8
Phosphatidate Phosphatase Activity (GO:0008195)	41275	0.235617	0.611188	3.99898	5.78071	LPIN3
Phosphatidylglycerol Binding (GO:1901611)	41275	0.235617	0.611188	3.99898	5.78071	GSDMD
Phosphotransferase Activity, For Other Substituted Phosphate Groups (GO:0016780)	41275	0.235617	0.611188	3.99898	5.78071	PIGG
Phosphatase Activity (GO:0016791)	30376	0.241057	0.619174	1.80212	2.56392	DUSP4;PGPEP1;LPIN3
1-Phosphatidylinositol-3-Kinase Regulator Activity (GO:0046935)	41640	0.251259	0.619174	3.69118	5.09851	PIK3R2
MAP Kinase Phosphatase Activity (GO:0033549)	41640	0.251259	0.619174	3.69118	5.09851	DUSP4
Aldo-Keto Reductase (NADP) Activity (GO:0004033)	41640	0.251259	0.619174	3.69118	5.09851	AKR7A2
Alkali Metal Ion Binding (GO:0031420)	41640	0.251259	0.619174	3.69118	5.09851	PDXK
Calcium-Dependent Cysteine-Type Endopeptidase Activity (GO:0004198)	41640	0.251259	0.619174	3.69118	5.09851	CAPN13
Clathrin Adaptor Activity (GO:0035615)	41640	0.251259	0.619174	3.69118	5.09851	AP1M1
Manganese Ion Binding (GO:0030145)	17564	0.257371	0.625651	2.08792	2.8338	XYLT2;LARGE2
Transmembrane Receptor Protein Serine/Threonine Kinase Activity (GO:0004675)	42005	0.266582	0.625651	3.42735	4.53121	TGFBR2
Insulin-Like Growth Factor Binding (GO:0005520)	42005	0.266582	0.625651	3.42735	4.53121	LRP2
RNA Polymerase III Activity (GO:0001056)	42005	0.266582	0.625651	3.42735	4.53121	POLR2F
Arachidonic Acid Epoxygenase Activity (GO:0008392)	42005	0.266582	0.625651	3.42735	4.53121	CYP2E1
Phospholipase Binding (GO:0043274)	42005	0.266582	0.625651	3.42735	4.53121	LCK
Death Receptor Binding (GO:0005123)	42005	0.266582	0.625651	3.42735	4.53121	DAB2IP
3',5'-Cyclic-Nucleotide Phosphodiesterase Activity (GO:0004114)	42370	0.281591	0.630533	3.19869	4.0537	PDE4B
Transmembrane Receptor Protein Phosphatase Activity (GO:0019198)	42370	0.281591	0.630533	3.19869	4.0537	PTPRA
Transmembrane Receptor Protein Tyrosine Phosphatase Activity (GO:0005001)	42370	0.281591	0.630533	3.19869	4.0537	PTPRA
Ionotropic Glutamate Receptor Activity (GO:0004970)	42370	0.281591	0.630533	3.19869	4.0537	PTK2B
Low-Density Lipoprotein Particle Binding (GO:0030169)	42370	0.281591	0.630533	3.19869	4.0537	MSR1
Arachidonic Acid Monooxygenase Activity (GO:0008391)	42370	0.281591	0.630533	3.19869	4.0537	CYP2E1
Phosphatidylinositol Kinase Activity (GO:0052742)	42370	0.281591	0.630533	3.19869	4.0537	PI4KB
Channel Activity (GO:0015267)	19025	0.287799	0.630533	1.92049	2.39196	GSDMD;MPV17
RNA Polymerase Binding (GO:0070063)	42736	0.296294	0.630533	2.99862	3.64753	BIN1
Phosphatidylcholine Transporter Activity (GO:0008525)	42736	0.296294	0.630533	2.99862	3.64753	ABCA3
Phosphatidylinositol 3-Kinase Regulator Activity (GO:0035014)	42736	0.296294	0.630533	2.99862	3.64753	PIK3R2
Basic Amino Acid Transmembrane Transporter Activity (GO:0015174)	42736	0.296294	0.630533	2.99862	3.64753	SLC7A3
Cadherin Binding Involved In Cell-Cell Adhesion (GO:0098641)	42736	0.296294	0.630533	2.99862	3.64753	BAIAP2
Chemokine Binding (GO:0019956)	42736	0.296294	0.630533	2.99862	3.64753	CCR3
Protein Phosphatase 1 Binding (GO:0008157)	42736	0.296294	0.630533	2.99862	3.64753	PPP1R3B
Myosin Binding (GO:0017022)	19756	0.302971	0.630533	1.84644	2.20487	SPATA6;SHROOM4
Oxidoreduction-Driven Active Transmembrane Transporter Activity (GO:0015453)	19756	0.302971	0.630533	1.84644	2.20487	COX4I1;MTCO2P12
Protein-Lysine N-methyltransferase Activity (GO:0016279)	19756	0.302971	0.630533	1.84644	2.20487	NSD3;VCPKMT
Ubiquitin Protein Ligase Activity (GO:0061630)	8/311	0.305157	0.630533	1.26996	1.50735	TRIM7;UBE3C;NEURL1;MIB2;RNF39;TRIM37;RNF220;BSPRY
Flavin Adenine Dinucleotide Binding (GO:0050660)	20121	0.310536	0.630533	1.81151	2.11848	CYB5R2;MICAL3
Protein Serine/Threonine Phosphatase Activity (GO:0004722)	20121	0.310536	0.630533	1.81151	2.11848	DUSP4;LCK
Hydrolase Activity, Hydrolyzing N-glycosyl Compounds (GO:0016799)	43101	0.310697	0.630533	2.82209	3.29884	MACROD1
GABA-A Receptor Activity (GO:0004890)	43101	0.310697	0.630533	2.82209	3.29884	GABRR2
Iron Ion Binding (GO:0005506)	20486	0.318084	0.632556	1.77787	2.03644	ALKBH2;PHF1
Amino Acid Transmembrane Transporter Activity (GO:0015171)	20486	0.318084	0.632556	1.77787	2.03644	SLC25A44;SLC7A3
Protein Serine/Threonine Kinase Activator Activity (GO:0043539)	20486	0.318084	0.632556	1.77787	2.03644	DAB2IP;IGF2
RNA Polymerase II-specific DNA-binding Transcription Factor Binding (GO:0061629)	6/228	0.324091	0.632556	1.29897	1.46359	DAXX;SMAD3;BHLHE40;KEAP1;TACC2;ETS2
Microtubule Plus-End Binding (GO:0051010)	43466	0.324806	0.632556	2.66517	2.99705	KIF2C
Alcohol Dehydrogenase (NADP+) Activity (GO:0008106)	43466	0.324806	0.632556	2.66517	2.99705	AKR7A2
Chemokine Receptor Activity (GO:0004950)	43466	0.324806	0.632556	2.66517	2.99705	CCR3
Ubiquitin-Like Protein Ligase Activity (GO:0061659)	8/319	0.329361	0.632556	1.23678	1.37357	TRIM7;UBE3C;NEURL1;MIB2;RNF39;TRIM37;RNF220;BSPRY
Transcription Coregulator Binding (GO:0001221)	36220	0.330029	0.632556	1.50054	1.66346	SREBF1;SMAD3;PHF1
Histone Deacetylase Binding (GO:0042826)	36220	0.330029	0.632556	1.50054	1.66346	NACC1;HSPA1B;HSPA1A
Phosphatidic Acid Binding (GO:0070300)	43831	0.338627	0.63659	2.52477	2.73396	GSDMD
Phosphatidylinositol Phospholipase C Activity (GO:0004435)	43831	0.338627	0.63659	2.52477	2.73396	PLCH2
Carboxylic Acid Transmembrane Transporter Activity (GO:0046943)	21582	0.340602	0.63659	1.68404	1.81378	SLC16A4;SLC7A3
Receptor Tyrosine Kinase Binding (GO:0030971)	21582	0.340602	0.63659	1.68404	1.81378	SHC1;PIK3R2
Telomerase RNA Binding (GO:0070034)	44197	0.352166	0.63659	2.39841	2.50311	WRAP53
Transforming Growth Factor Beta Binding (GO:0050431)	44197	0.352166	0.63659	2.39841	2.50311	TGFBR2
GABA Receptor Activity (GO:0016917)	44197	0.352166	0.63659	2.39841	2.50311	GABRR2
Lipid Kinase Activity (GO:0001727)	44197	0.352166	0.63659	2.39841	2.50311	SPHK1
Cyclic Nucleotide Binding (GO:0030551)	44197	0.352166	0.63659	2.39841	2.50311	PDE4B
Ephrin Receptor Binding (GO:0046875)	44197	0.352166	0.63659	2.39841	2.50311	SHC1
Protein Kinase Regulator Activity (GO:0019887)	3/103	0.352431	0.63659	1.44022	1.50201	DAXX;MBIP;DUSP19
Single-Stranded DNA Helicase Activity (GO:0017116)	44562	0.365428	0.64631	2.28408	2.29935	WRNIP1
Kinase Activity (GO:0016301)	3/106	0.369177	0.64631	1.39806	1.39313	PDXK;TKFC;SPHK1
L-amino Acid Transmembrane Transporter Activity (GO:0015179)	23043	0.370248	0.64631	1.57329	1.56319	SLC6A9;SLC7A3
Acyltransferase Activity, Transferring Groups Other Than Amino-Acyl Groups (GO:0016747)	23408	0.377579	0.64631	1.54783	1.50755	SPHK1;FASN
K63-linked Polyubiquitin Modification-Dependent Protein Binding (GO:0070530)	44927	0.378419	0.64631	2.18015	2.11856	PRPF8
Lipoprotein Particle Binding (GO:0071813)	44927	0.378419	0.64631	2.18015	2.11856	MSR1
Lysine-Acetylated Histone Binding (GO:0070577)	44927	0.378419	0.64631	2.18015	2.11856	BRD2
Acetylation-Dependent Protein Binding (GO:0140033)	44927	0.378419	0.64631	2.18015	2.11856	BRD2
Actin Monomer Binding (GO:0003785)	44927	0.378419	0.64631	2.18015	2.11856	PFN4
Phospholipase C Activity (GO:0004629)	44927	0.378419	0.64631	2.18015	2.11856	PLCH2
Calmodulin-Dependent Protein Kinase Activity (GO:0004683)	44927	0.378419	0.64631	2.18015	2.11856	PTK2B
Purine Ribonucleoside Triphosphate Binding (GO:0035639)	11/476	0.382953	0.650831	1.13679	1.09114	MAP4K1;HSP90AA2P;HSP90AB2P;PDXK;SPHK1;VPS4A;ARL1;SMC4;HSPA1B;HSPA1A;TGM2
Guanyl-Nucleotide Exchange Factor Activity (GO:0005085)	5/203	0.401133	0.659933	1.21218	1.10729	TRIO;IQSEC2;RANGRF;RGL4;ARHGEF7
Wide Pore Channel Activity (GO:0022829)	45658	0.403611	0.659933	1.99826	1.81303	GSDMD
Lysine N-methyltransferase Activity (GO:0016278)	45658	0.403611	0.659933	1.99826	1.81303	VCPKMT
Nuclear Androgen Receptor Binding (GO:0050681)	45658	0.403611	0.659933	1.99826	1.81303	DAXX
Oxidoreductase Activity, Acting On Paired Donors, With Incorporation Or Reduction Of Molecular Oxygen, Reduced Flavin Or Flavoprotein As One Donor, And Incorporation Of One Atom Of Oxygen (GO:0016712)	45658	0.403611	0.659933	1.99826	1.81303	CYP2E1
Adenylyltransferase Activity (GO:0070566)	45658	0.403611	0.659933	1.99826	1.81303	FHIT
Epidermal Growth Factor Receptor Binding (GO:0005154)	45658	0.403611	0.659933	1.99826	1.81303	SHC1
Ferrous Iron Binding (GO:0008198)	45658	0.403611	0.659933	1.99826	1.81303	ALKBH2
Calcium Ion Transmembrane Transporter Activity (GO:0015085)	24869	0.406531	0.661572	1.45373	1.30849	TRPV3;SLC8B1
Nuclear Receptor Binding (GO:0016922)	3/115	0.418842	0.678406	1.28512	1.11839	DAXX;SMAD3;TACC2
Voltage-Gated Monoatomic Ion Channel Activity (GO:0005244)	46388	0.427784	0.686445	1.84436	1.56611	PTK2B
Carboxy-Lyase Activity (GO:0016831)	46388	0.427784	0.686445	1.84436	1.56611	SFI1
ATPase Binding (GO:0051117)	26696	0.441778	0.702365	1.35101	1.1037	LCK;VCPKMT
Phosphatidylinositol-4,5-Bisphosphate Binding (GO:0005546)	26696	0.441778	0.702365	1.35101	1.1037	RPH3A;GSDMD
Gamma-Tubulin Binding (GO:0043015)	47119	0.45098	0.704019	1.71245	1.36368	TUBGCP3
Histone Demethylase Activity (GO:0032452)	47119	0.45098	0.704019	1.71245	1.36368	PHF1
Hydrolase Activity, Hydrolyzing O-glycosyl Compounds (GO:0004553)	47119	0.45098	0.704019	1.71245	1.36368	GUSB
miRNA Binding (GO:0035198)	47119	0.45098	0.704019	1.71245	1.36368	AGO2
Glucuronosyltransferase Activity (GO:0015020)	10959	0.462224	0.709857	1.65331	1.27587	LARGE2
pre-mRNA Binding (GO:0036002)	10959	0.462224	0.709857	1.65331	1.27587	PRPF8
G Protein-Coupled Peptide Receptor Activity (GO:0008528)	28157	0.469128	0.709857	1.27869	0.967813	MC1R;LTB4R2
Protease Binding (GO:0002020)	3/125	0.472418	0.709857	1.17918	0.884254	BIN1;RHBDD2;DERL3
Kinesin Binding (GO:0019894)	11324	0.473238	0.709857	1.59812	1.19564	KLC4
O-acyltransferase Activity (GO:0008374)	11324	0.473238	0.709857	1.59812	1.19564	LCAT
RNA Polymerase II Complex Binding (GO:0000993)	11324	0.473238	0.709857	1.59812	1.19564	AGO2
SH2 Domain Binding (GO:0042169)	11324	0.473238	0.709857	1.59812	1.19564	LCK
Adenyl Nucleotide Binding (GO:0030554)	11324	0.473238	0.709857	1.59812	1.19564	G6PD
Cadherin Binding (GO:0045296)	7/319	0.478671	0.714899	1.07597	0.792714	MACF1;NOTCH3;FASN;DAB2IP;TNKS1BP1;BAIAP2;HSPA1A
Cis-Regulatory Region Sequence-Specific DNA Binding (GO:0000987)	23/1098	0.483472	0.716692	1.02631	0.745884	ZNF683;ZNF660;SREBF1;ZNF681;SMAD3;ZFHX2;PAX4;ZNF76;TBR1;ZBTB22;OVOL1;ZFX;PAX2;ETS2;SALL4;ZSCAN32;NACC1;BHLHE40;ZNF526;ZNF746;HOXC4;ZNF568;ZNF302
Monocarboxylic Acid Transmembrane Transporter Activity (GO:0008028)	11689	0.484027	0.716692	1.54649	1.12216	SLC16A4
RNA Polymerase Core Enzyme Binding (GO:0043175)	12055	0.494596	0.724965	1.49809	1.05467	AGO2
Sequence-Specific Double-Stranded DNA Binding (GO:1990837)	15/715	0.496992	0.724965	1.02743	0.718359	ZNF660;SREBF1;SMAD3;PAX4;ZNF76;ZBTB22;OVOL1;PAX2;ETS2;ALKBH2;BHLHE40;ZNF746;HOXC4;ZNF568;KIF2C
Transcription Coactivator Binding (GO:0001223)	12420	0.504948	0.724965	1.45261	0.992571	SMAD3
DNA-directed 5'-3' RNA Polymerase Activity (GO:0003899)	12420	0.504948	0.724965	1.45261	0.992571	POLR2F
Hsp70 Protein Binding (GO:0030544)	12420	0.504948	0.724965	1.45261	0.992571	CYP2E1
Sodium Ion Transmembrane Transporter Activity (GO:0015081)	12420	0.504948	0.724965	1.45261	0.992571	SLC8B1
Solute:Sodium Symporter Activity (GO:0015370)	12420	0.504948	0.724965	1.45261	0.992571	SLC34A1
Inorganic Cation Transmembrane Transporter Activity (GO:0022890)	12785	0.515089	0.724965	1.40982	0.935295	PTK2B
Ion Channel Inhibitor Activity (GO:0008200)	12785	0.515089	0.724965	1.40982	0.935295	CAV3
Hsp90 Protein Binding (GO:0051879)	12785	0.515089	0.724965	1.40982	0.935295	CYP2E1
NADP Binding (GO:0050661)	12785	0.515089	0.724965	1.40982	0.935295	G6PD
Core Promoter Sequence-Specific DNA Binding (GO:0001046)	12785	0.515089	0.724965	1.40982	0.935295	AGO2
Actin Binding (GO:0003779)	4/183	0.516932	0.724965	1.07108	0.706747	MACF1;COTL1;MICAL3;PFN4
Protein Tyrosine Kinase Binding (GO:1990782)	31079	0.521342	0.726186	1.15497	0.752287	SHC1;PIK3R2
Histone H3 Methyltransferase Activity (GO:0140938)	13150	0.525023	0.726186	1.36947	0.882366	NSD3
Basal RNA Polymerase II Transcription Machinery Binding (GO:0001099)	13150	0.525023	0.726186	1.36947	0.882366	AGO2
RNA Polymerase II Cis-Regulatory Region Sequence-Specific DNA Binding (GO:0000978)	23/1122	0.526222	0.726186	1.0026	0.643701	ZNF683;ZNF660;SREBF1;ZNF681;SMAD3;ZFHX2;PAX4;ZNF76;TBR1;ZBTB22;OVOL1;ZFX;PAX2;ETS2;SALL4;ZSCAN32;NACC1;BHLHE40;ZNF526;ZNF746;HOXC4;ZNF568;ZNF302
Heme Binding (GO:0020037)	31809	0.53385	0.72921	1.12768	0.707777	CBS;CYP2E1
N-acyltransferase Activity (GO:0016410)	13516	0.534754	0.72921	1.33136	0.833363	TGM2
Calcium Channel Regulator Activity (GO:0005246)	13516	0.534754	0.72921	1.33136	0.833363	CAV3
Sulfotransferase Activity (GO:0008146)	13881	0.544286	0.739286	1.29531	0.787913	SULT1A2
Zinc Ion Binding (GO:0008270)	7/341	0.549069	0.742859	1.00395	0.601902	RPH3A;PDXK;PHF5A;SMAD3;PHF1;BAZ1B;SEC24D
Tau Protein Binding (GO:0048156)	14246	0.553623	0.74319	1.26116	0.745688	BIN1
Pentosyltransferase Activity (GO:0016763)	14246	0.553623	0.74319	1.26116	0.745688	LARGE2
Calcium Channel Activity (GO:0005262)	33270	0.558186	0.746411	1.07677	0.627828	TRPV3;CACNA2D4
Acetylglucosaminyltransferase Activity (GO:0008375)	14611	0.562769	0.749634	1.22876	0.706396	EXTL3
Phosphatidylinositol Bisphosphate Binding (GO:1902936)	34001	0.570011	0.749986	1.053	0.591892	RPH3A;GSDMD
RNA Endonuclease Activity (GO:0004521)	14977	0.571728	0.749986	1.19798	0.669779	AGO2
Neutral L-amino Acid Transmembrane Transporter Activity (GO:0015175)	14977	0.571728	0.749986	1.19798	0.669779	SLC6A9
Signal Sequence Binding (GO:0005048)	14977	0.571728	0.749986	1.19798	0.669779	PEX5
Transcription Corepressor Binding (GO:0001222)	15342	0.580504	0.75009	1.1687	0.635606	PHF1
Lipase Activity (GO:0016298)	15342	0.580504	0.75009	1.1687	0.635606	LCAT
Promoter-Specific Chromatin Binding (GO:1990841)	15342	0.580504	0.75009	1.1687	0.635606	ZNF683
Regulatory RNA Binding (GO:0061980)	15342	0.580504	0.75009	1.1687	0.635606	AGO2
Cell-Cell Adhesion Mediator Activity (GO:0098632)	15707	0.589101	0.753908	1.14081	0.603671	BAIAP2
snRNA Binding (GO:0017069)	15707	0.589101	0.753908	1.14081	0.603671	PRPF8
Transition Metal Ion Binding (GO:0046914)	9/456	0.590015	0.753908	0.963624	0.508415	RPH3A;PDXK;PHF5A;SMAD3;PHF1;XYLT2;BAZ1B;SEC24D;LARGE2
Signaling Receptor Complex Adaptor Activity (GO:0030159)	16072	0.597522	0.760683	1.11423	0.573787	SHC1
Potassium Channel Regulator Activity (GO:0015459)	16438	0.605771	0.767535	1.08885	0.545789	CAV3
Ubiquitin-Protein Transferase Activity (GO:0004842)	8/412	0.608556	0.767535	0.947483	0.470583	TRIM7;UBE3C;NEURL1;RNF39;MIB2;TRIM37;RNF220;BSPRY
Cytokine Receptor Binding (GO:0005126)	2/100	0.609579	0.767535	0.977436	0.483818	SMAD3;IL34
Hydro-Lyase Activity (GO:0016836)	16803	0.613851	0.770104	1.0646	0.519527	CBS
Voltage-Gated Calcium Channel Activity (GO:0005245)	17168	0.621766	0.774402	1.0414	0.494865	CACNA2D4
Calcium-Dependent Phospholipid Binding (GO:0005544)	17168	0.621766	0.774402	1.0414	0.494865	RPH3A
Carboxylic Ester Hydrolase Activity (GO:0052689)	2/104	0.630917	0.782972	0.938912	0.432446	H6PD;LCAT
Pyrophosphatase Activity (GO:0016462)	17899	0.637113	0.785762	0.997906	0.449864	FHIT
Phosphatidylinositol Binding (GO:0035091)	2/106	0.64124	0.785762	0.920762	0.409141	RPH3A;SNX8
Cysteine-Type Endopeptidase Activity (GO:0004197)	2/106	0.64124	0.785762	0.920762	0.409141	CAPN13;ESPL1
Transmembrane Receptor Protein Tyrosine Kinase Activity (GO:0004714)	18264	0.644553	0.785762	0.977491	0.429313	TYRO3
S-adenosylmethionine-dependent Methyltransferase Activity (GO:0008757)	18264	0.644553	0.785762	0.977491	0.429313	PCMTD2
E-box Binding (GO:0070888)	18629	0.65184	0.791848	0.957892	0.409936	BHLHE40
Phosphoric Ester Hydrolase Activity (GO:0042578)	18994	0.658978	0.795016	0.939062	0.39165	DUSP4
Syntaxin Binding (GO:0019905)	19360	0.66597	0.795016	0.920956	0.374379	STX10
Monoatomic Anion Channel Activity (GO:0005253)	19360	0.66597	0.795016	0.920956	0.374379	LRRC8E
Polyubiquitin Modification-Dependent Protein Binding (GO:0031593)	19360	0.66597	0.795016	0.920956	0.374379	PRPF8
Serine-Type Endopeptidase Inhibitor Activity (GO:0004867)	19360	0.66597	0.795016	0.920956	0.374379	SERPINA6
Endopeptidase Inhibitor Activity (GO:0004866)	2/112	0.670847	0.798077	0.87027	0.347424	BIN1;SERPINA6
Transcription Regulatory Region Nucleic Acid Binding (GO:0001067)	4/224	0.675287	0.798208	0.86963	0.341432	SMAD3;ZNF746;ZNF568;PAX2
Deubiquitinase Activity (GO:0101005)	2/113	0.675585	0.798208	0.862386	0.338207	USP32;PRPF8
GTPase Binding (GO:0051020)	4/225	0.678663	0.799108	0.86565	0.335553	SGSM2;PEX5;RANGRF;AMBRA1
Hydrolase Activity, Acting On Carbon-Nitrogen (But Not Peptide) Bonds, In Linear Amides (GO:0016811)	20455	0.6861	0.803403	0.870588	0.327979	FHIT
DNA-binding Transcription Factor Binding (GO:0140297)	5/282	0.686967	0.803403	0.862941	0.324007	DAXX;SMAD3;BHLHE40;KEAP1;ETS2
RNA Polymerase II Transcription Regulatory Region Sequence-Specific DNA Binding (GO:0000977)	23/1225	0.695037	0.810093	0.911579	0.331624	ZNF683;ZNF660;SREBF1;ZNF681;SMAD3;ZFHX2;PAX4;ZNF76;TBR1;ZBTB22;OVOL1;ZFX;PAX2;ETS2;SALL4;ZSCAN32;NACC1;BHLHE40;ZNF526;ZNF746;HOXC4;ZNF568;ZNF302
Endonuclease Activity (GO:0004519)	21186	0.698842	0.811787	0.839955	0.300981	AGO2
SH3 Domain Binding (GO:0017124)	21551	0.705019	0.813986	0.825431	0.288513	DAB2IP
Protein Homodimerization Activity (GO:0042803)	12/662	0.705455	0.813986	0.880806	0.307324	G6PD;PDXK;SMAD3;TENM4;MTCL1;CBS;BHLHE40;DAB2IP;TRIM37;SLC8B1;PHETA1;FBLN5
UDP-glycosyltransferase Activity (GO:0008194)	22282	0.716996	0.824545	0.797835	0.265428	LARGE2
Microtubule Binding (GO:0008017)	4/239	0.723348	0.82704	0.813491	0.263461	MACF1;MTCL1;KIF2C;TUBGCP3
Metallopeptidase Activity (GO:0008237)	2/124	0.724103	0.82704	0.784187	0.253152	ADAM11;PRPF8
Ubiquitin-Like Protein Transferase Activity (GO:0019787)	4/240	0.726357	0.82704	0.810002	0.258969	NEURL1;MIB2;TRIM37;RNF220
DNA-binding Transcription Repressor Activity, RNA Polymerase II-specific (GO:0001227)	4/243	0.735236	0.834396	0.799711	0.245963	NACC1;BHLHE40;ZNF746;ETS2
Metal Ion Binding (GO:0046872)	9/521	0.741947	0.839252	0.838433	0.250253	CLXN;RPH3A;PDXK;SPHK1;XYLT2;LRP2;PGPEP1;EXTL3;TGM2
Protein Heterodimerization Activity (GO:0046982)	3/190	0.749036	0.844502	0.766734	0.221562	TENM4;BHLHE40;PIK3R2
Methylation-Dependent Protein Binding (GO:0140034)	24838	0.75522	0.8487	0.714223	0.200516	PHF1
RNA Nuclease Activity (GO:0004540)	25569	0.765163	0.857082	0.69345	0.185614	AGO2
Methylated Histone Binding (GO:0035064)	25934	0.769982	0.859689	0.683508	0.178661	PHF1
Small GTPase Binding (GO:0031267)	3/199	0.776383	0.86404	0.731188	0.18507	SGSM2;PEX5;RANGRF
G Protein-Coupled Receptor Binding (GO:0001664)	2/140	0.783631	0.866764	0.692697	0.168891	HSPA1B;HSPA1A
Hormone Activity (GO:0005179)	27030	0.783856	0.866764	0.655318	0.15959	FSHB
Voltage-Gated Monoatomic Cation Channel Activity (GO:0022843)	27760	0.792638	0.870892	0.637778	0.148212	CACNA2D4
Cytokine Receptor Activity (GO:0004896)	27760	0.792638	0.870892	0.637778	0.148212	CCR3
Cysteine-Type Peptidase Activity (GO:0008234)	2/144	0.796635	0.872505	0.673046	0.153022	ESPL1;USP32
Amyloid-Beta Binding (GO:0001540)	28856	0.805148	0.879038	0.613154	0.132888	MSR1
Ubiquitin Binding (GO:0043130)	29221	0.809149	0.880619	0.605361	0.128199	SMAD3
Chromatin DNA Binding (GO:0031490)	30317	0.820665	0.890344	0.583124	0.115249	ZFX
Protein Kinase Binding (GO:0019901)	8/511	0.823854	0.891002	0.757074	0.146692	DAXX;SMAD3;LCK;CADPS;DAB2IP;DUSP19;ARHGEF7;CNTLN
Growth Factor Activity (GO:0008083)	31048	0.827955	0.892639	0.569182	0.107459	IGF2
Protein Serine/Threonine Kinase Activity (GO:0004674)	5/342	0.831613	0.893255	0.707098	0.13038	MAP4K1;BRD2;PTK2B;MYLK;TGFBR2
Kinase Binding (GO:0019900)	7/460	0.833705	0.893255	0.735648	0.133797	DAXX;SMAD3;LCK;CADPS;DAB2IP;ARHGEF7;CNTLN
DNA-binding Transcription Activator Activity, RNA Polymerase II-specific (GO:0001228)	5/348	0.842515	0.8999	0.694513	0.119014	SREBF1;SMAD3;HOXC4;ZNF76;ZFX
Double-Stranded DNA Binding (GO:0003690)	10/650	0.859537	0.913376	0.742129	0.112329	ZNF660;SREBF1;BHLHE40;PAX4;HOXC4;ZNF76;ZBTB22;OVOL1;PAX2;ETS2
Growth Factor Receptor Binding (GO:0070851)	35065	0.863074	0.913376	0.502993	0.0740679	SHC1
Hexosyltransferase Activity (GO:0016758)	35065	0.863074	0.913376	0.502993	0.0740679	LARGE2
Cysteine-Type Deubiquitinase Activity (GO:0004843)	35796	0.868644	0.916459	0.492571	0.0693649	USP32
Sequence-Specific DNA Binding (GO:0043565)	11/717	0.871355	0.916517	0.739302	0.101806	ZNF660;SREBF1;SMAD3;BHLHE40;PAX4;HOXC4;ZNF76;ZBTB22;OVOL1;PAX2;ETS2
Metalloendopeptidase Activity (GO:0004222)	1/101	0.876577	0.919207	0.477721	0.0629303	ADAM11
Monoatomic Cation Channel Activity (GO:0005261)	1/105	0.886417	0.926708	0.459252	0.0553713	TRPV3
Tubulin Binding (GO:0015631)	4/322	0.898161	0.936149	0.598587	0.0642921	MTCL1;KIF2C;TUBGCP3;ARHGEF7
GTP Binding (GO:0005525)	2/201	0.919373	0.955373	0.478856	0.040254	ARL1;TGM2
Transcription Cis-Regulatory Region Binding (GO:0000976)	6/474	0.924921	0.956412	0.608354	0.0474804	SREBF1;SMAD3;AGO2;ZNF746;ZNF568;PAX2
Calcium Ion Binding (GO:0005509)	4/346	0.925918	0.956412	0.555888	0.0427867	CLXN;RPH3A;LRP2;TGM2
mRNA Binding (GO:0003729)	3/282	0.930154	0.95792	0.511468	0.037033	CLUH;PEG10;AGO2
Guanyl Ribonucleotide Binding (GO:0032561)	2/226	0.947299	0.972673	0.424864	0.0230023	ARL1;TGM2
Receptor Ligand Activity (GO:0048018)	3/319	0.960249	0.983044	0.450716	0.0182823	IL34;IGF2;HSPA1A
G Protein-Coupled Receptor Activity (GO:0004930)	2/250	0.965258	0.984142	0.383273	0.0135525	MC1R;LTB4R2
RNA Binding (GO:0003723)	20/1411	0.971317	0.984142	0.672705	0.019577	DMGDH;MACF1;CLUH;MTCL1;STRBP;RRP1;TCF20;PRPF8;CHERP;DHX30;PHF5A;LTB4R2;FASN;PEG10;AGO2;HNRNPH3;UTP14A;HSPA1B;HSPA1A;WRAP53
GTPase Activity (GO:0003924)	2/265	0.973322	0.984142	0.361133	0.00976523	ARL1;SEPTIN8
Cytokine Activity (GO:0005125)	1/178	0.975135	0.984142	0.268832	0.006769	IL34
Ribonucleoside Triphosphate Phosphatase Activity (GO:0017111)	2/270	0.975584	0.984142	0.354303	0.00875805	ARL1;SEPTIN8
DNA Binding (GO:0003677)	10/846	0.980626	0.986344	0.562261	0.0110001	SREBF1;SMAD3;MTERF2;PHF1;SPHK1;PAX4;ZNF76;ZBTB22;PAX2;ETS2
Endopeptidase Activity (GO:0004175)	2/335	0.992454	0.995339	0.284186	0.00215259	ESPL1;ADAM11
Olfactory Receptor Activity (GO:0004984)	1/362	0.99947	0.99947	0.130561	6.91813e-05	OR6C70
